# Supplementary material
Source: Elsevier journal article supplement (https://www.sciencedirect.com/science/article/pii/S266627522100309X)

**ABD-D-21-00036 – Material Suplementar**

**Tabela Suplementar 1** *Primers* *Forward* (F) e *Reverse* (R) e ciclagem da qPCR para Dsg 1, 2 e 3, e gene endógeno ribossomal humano (18S)

| **Gene alvo** | **Tamanho do amplicon** | | **Sequência dos *primers*** | **Ciclagem** | **Referênciasa** |
| --- | --- | --- | --- | --- | --- |
| Dsg1 | 411bp | F | 5' TCAAGTTCGCAGCAGCCTGT3' | 95°C por 2 min; 45 ciclos: 94°C por 1 min; 57°C por 2 min; 72°C por 2 min | (13) |
| R | 5' TGTTCGGTTCATCTGCGTCA 3' |
| Dsg2 | 793bp | F | 5' CAGTAGCTTCCCAGTTCC3' | 95°C por 2 min; 45 ciclos: 94°C por 1 min; 57°C por 2 min; 72oC por 2 min | (13) |
| R | 5'CTGTAAGCTTCATGAAAAATCAG 3' |
| Dsg3 | 107bp | F | 5' TGATCTGTCCCATTTCCAGTGT3' | 95°C por 2 min; 45 ciclos: 95°C por 15 seg; 60°C por 60 seg | (14) |
| R | 5' TCATATTAGACGGGAGCAAGGA3' |
| 18S | 151bp | F | 5' GTAACCCGTTGAACCCCATT 3' | 95°C por 2 min; 45 ciclos: 95°C por 15 seg; 60°C por 60 seg | (15) |
| R | 5' CCATCCAATCGGTAGTAGCG 3' |

aAs sequências dos *primers* foram compiladas das referências citadas.

**Tabela Suplementar 2** Sequência de valores de anti-Dsg2 em DO dos soros de pacientes com PF e PV após quatro ensaios de adsorção dos soros com peptídeo Dsg2 por ELISA indireto (1º ao 4º ensaio)

|  | **Pré-adsorçãoa** | **1º ensaio** | **2º ensaio** | **3º ensaio** | **4º ensaio** | **p** |
| --- | --- | --- | --- | --- | --- | --- |
| **PF1** | 0,358 | 0,232 | 0,183 | 0,140 | 0,062 | 0,0008 |
| **PF2** | 0,573 | 0,391 | 0,241 | 0,156 | 0,081 |  |
| **PF3** | 0,241 | 0,188 | 0,093 | 0,098 | 0,054 |  |
| **PF4** | 0,322 | 0,220 | 0,052 | 0,136 | 0,063 |  |
| **PF5** | 0,296 | 0,241 | 0,034 | 0,097 | 0,067 |  |
| **PF6** | 0,186 | 0,188 | 0,029 | 0,082 | 0,057 |  |
| **Mediana** | 0,309 | 0,226 | 0,073 | 0,117 | 0,063 |  |
| **PV1** | 0,670 | 0,165 | 0,144 | 0,131 | 0,069 | 0,0002 |
| **PV2** | 0,386 | 0,238 | 0,155 | 0,170 | 0,073 |  |
| **PV3** | 0,303 | 0,197 | 0,102 | 0,171 | 0,077 |  |
| **PV4** | 0,416 | 0,249 | 0,032 | 0,149 | 0,082 |  |
| **PV5** | 0,511 | 0,408 | 0,168 | 0,154 | 0,082 |  |
| **PV** | 0,194 | 0,168 | 0,090 | 0,081 | 0,044 |  |
| **Mediana** | 0,401 | 0,218 | 0,123 | 0,152 | 0,075 |  |

aAnti-Dsg2 *cut-off*= 0,1365 DO (ELISA indireto *in house*).

**Tabela Suplementar 3** Sequência de valores de autoanticorpos anti-Dsg1 e 3 pré- e pós-adsorção sérica com o peptídio Dsg2 determinado por ELISA indireto *in house*

|  | **Anti-Dsg1 pré-adsorção (U/mL)a** | **Anti-Dsg1 pós-adsorção (U/mL)** | **p** |
| --- | --- | --- | --- |
| **PF1** | 146,4 | 161,7 | 0,999 |
| **PF2** | 225,8 | 150,7 |  |
| **PF3** | 241,8 | 269,8 |  |
| **PF4** | 112,8 | 121,7 |  |
| **PF5** | 209,0 | 223,8 |  |
| **PF6** | 219,3 | 186,6 |  |
| **Mediana** | 214,2 | 174,2 |  |
|  | **Anti-Dsg3 pré-adsorção (U/mL)a** | **Anti-Dsg3 pós-adsorção (U/mL)** |  |
| **PV1** | 185,9 | 185,2 | 0,406 |
| **PV2** | 158,5 | 181,5 |  |
| **PV3** | 150,5 | 175,4 |  |
| **PV4** | 152,5 | 151,8 |  |
| **PV5** | 169,9 | 155,7 |  |
| **PV6** | 137,1 | 174,0 |  |
| **Mediana** | 174,7 | 144,8 |  |

aAnti-Dsg1 e anti-Dsg3 *cut-off* = < 20 U/mL (ELISA, MBL, Japão).

**Figura suplementar 1** Curvas ROC com valores de ELISA anti-Dsg2 (DO) para pacientes com PF (**A**), PV (**B**) e PF + PV (**C**) em comparação com controles. O *cut-off* foi definido em 0,1365 DO. *PF*, pênfigo foliáceo; *PV*, pênfigo vulgar; *AUC*, área sob a curva.


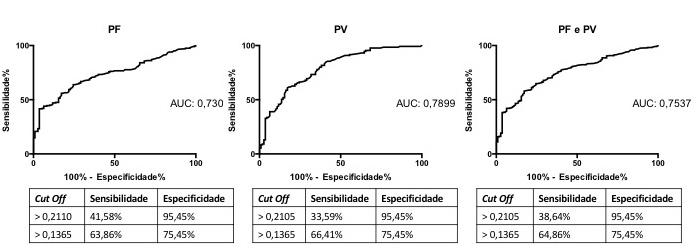


**Figura suplementar 2** Títulos de anti-Dsg2 em pacientes com PV em tratamento imunossupressor ou não. Os títulos de anti-Dsg2 foram maiores no grupo não tratado comparado com aqueles que realizaram tratamento (sem ou com lesões ativas) (p = 0,0110 e p = 0,0311, respectivamente). A linha horizontal em cada grupo indica a mediana; a linha tracejada, o valor de corte. Teste de Kruskall-Wallis seguido por comparação múltipla de Dunn.


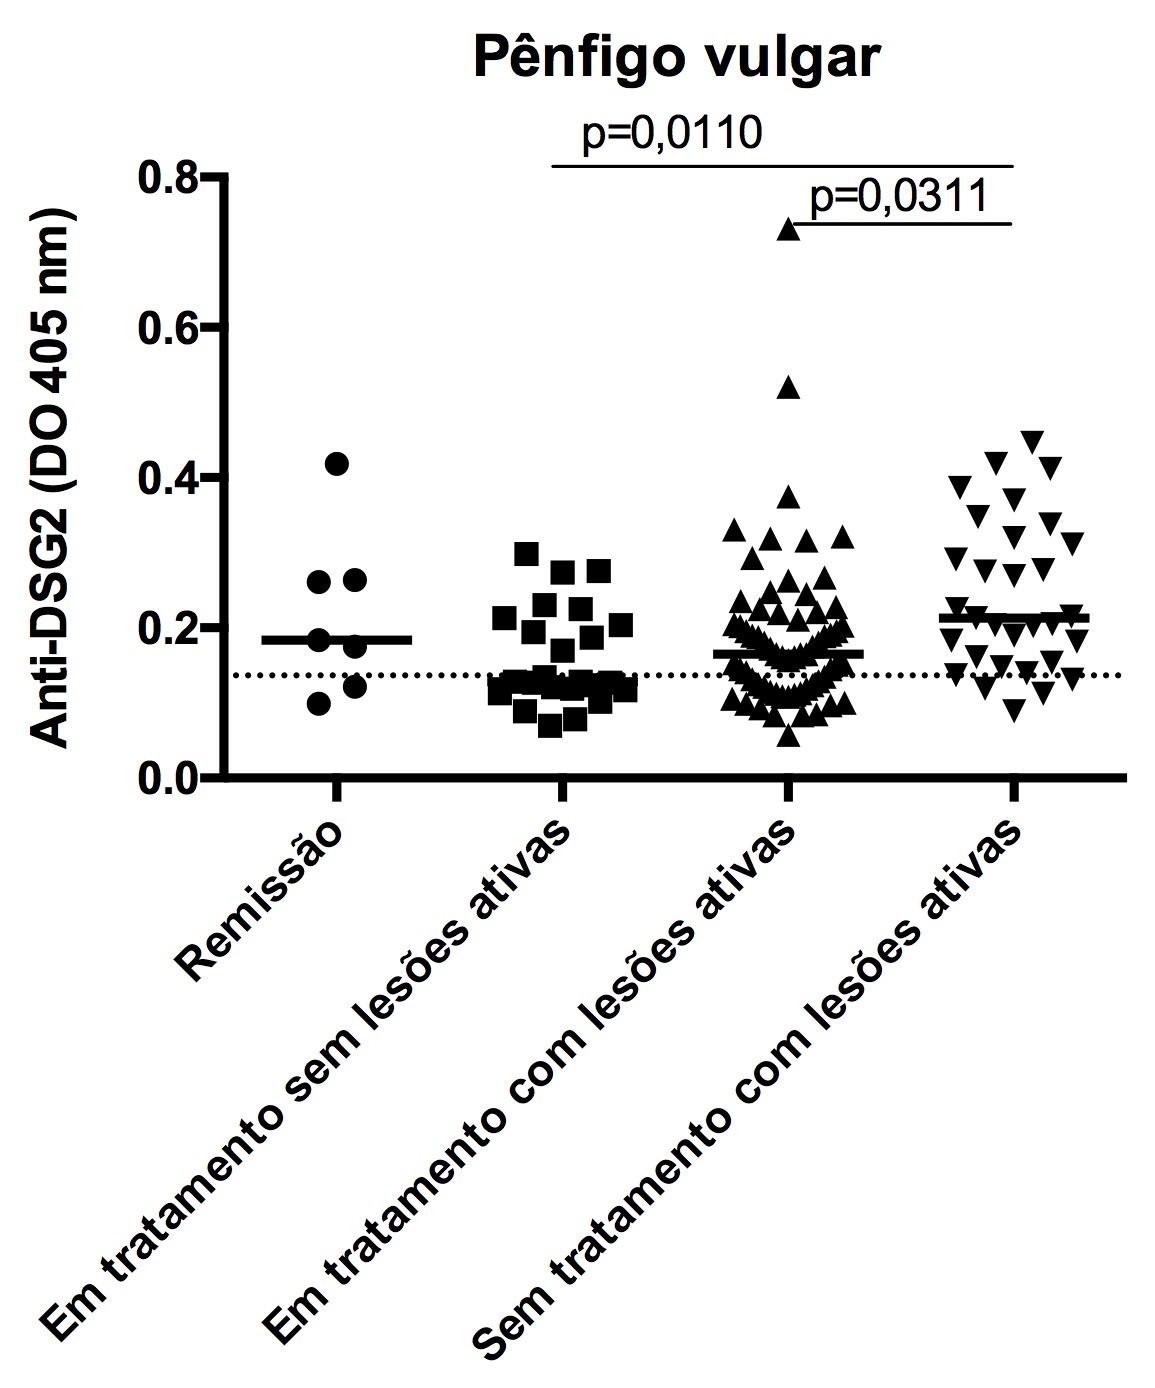


**Figura suplementar 3** Curvas de amplificação de cDNA de amostras de pele e/ou mucosa de pacientes com PF e PV e controle de *lifting facial* (LF) para Dsg1, 2 e 3. A ordenada mostra a fluorescência emitida, e a abcissa, os ciclos de reação da qPCR. A linha vermelha contínua horizontal mostra o *Threshold* da reação. **A,** cDNA das amostras para Dsg1 foram amplificados entre 20 e 30 ciclos. As duas curvas que precedem as demais correspondem às amostras de mucosa lesional do paciente PV2. **B,** cDNA das amostras para Dsg2 foram amplificados entre 23 e 33 ciclos. As quatro curvas que precedem as demais correspondem às amostras de mucosa lesional do paciente PV2 e à mucosa íntegra do paciente PF2. **C,** cDNA das amostras para Dsg3 foram amplificados entre 18 e 32 ciclos. As duas curvas que precedem as demais correspondem às amostras de mucosa lesional do paciente PV2.


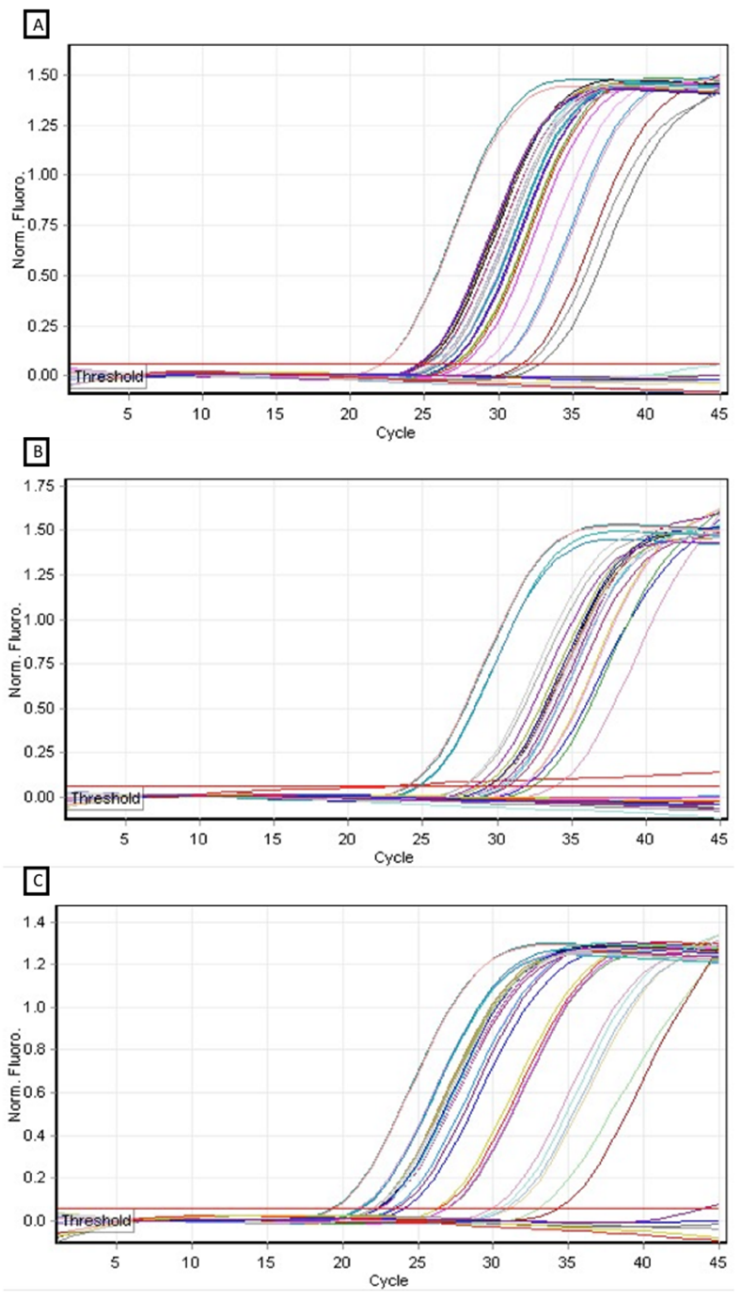

Supplement: mmc1 [file S266627522100309X:mmc1.doc]
